# Supplementary material
Source: PubMed Central journal article supplement (PMC2504782)
Supplement: 0802501105_0802501105SI.pdf [file 0802501105_0802501105SI.pdf]

# Supporting Information

Lewis *et al.* 10.1073/pnas.0802501105

## SI Text: Notes on Glacial Modeling

To estimate the temperature at which glaciers within the Olympus Range became cold-based, we modeled a glacier for which we have a mid-Miocene configuration based on mapped moraines and drift limits. The glacier was just under 11 km in length, and no more than 100 m in thickness (Fig. S2). The uncertainties in paleoclimate and long-term (>10,000 years) stability of glacier margins make appropriate a steady-state, thermomechanically coupled model with higher-order stress treatments (full Stokes equations are solved in the  $x$ - $z$  plane) (1). The surface boundary was stress-free, and an adiabatic lapse rate and a temperature at sea level specified the surface temperature. For basal boundary conditions, we specified no basal sliding and used regional estimates (2) of  $68 \text{ mW}\cdot\text{m}^{-2}$  for geothermal heat flux. To determine the surface temperature corresponding to the transition from warm- to cold-based conditions, the inverse model was used, altering temperature at sea level until the glacial bed exceeded the pressure melting point.

The thermodynamic model is accounting for strain heating, temperature advection due to ice flow, and geothermal heating. It is neglecting the contributions of surface melt water and heats of fusion that would arise as the temperatures increase. At this time, we know of no physics-based models for this process. We maintain that our approach is a good first-order approximation of the point at which the cold- to wet-based transition occurs due to the high rates of evaporation resulting from strong katabatic winds in the area. Hence, we do not anticipate that surface melt played a significant role in the heat budget of this glacier.

Model results (Fig. S2) show that basal ice conditions would have been sensitive to ice surface temperature (annual average air temperature) and geothermal heat flow, but insensitive to accumulation rates. The maximum mean surface temperature that maintains cold-based conditions is  $-3^\circ\text{C}$ , indicating that the contribution of ice flow and deformation heating in this glacier is  $\approx 3^\circ\text{C}$  of heating.

1. Johnson JV, Willenbring JK (2007) Modeling long-term stability of the Ferrar Glacier, East Antarctica: Implications for interpreting cosmogenic nuclide inheritance. *J Geophys Res* 112:F03S30.

2. Llubes M, Lanseau C, Rémy F (2006) Relations between basal condition, subglacial hydrological networks and geothermal heat flux in Antarctica. *Earth Planet Sci Lett* 241:655–662.

# Age-Probability Spectrum for Run 12291, ALS05-55B

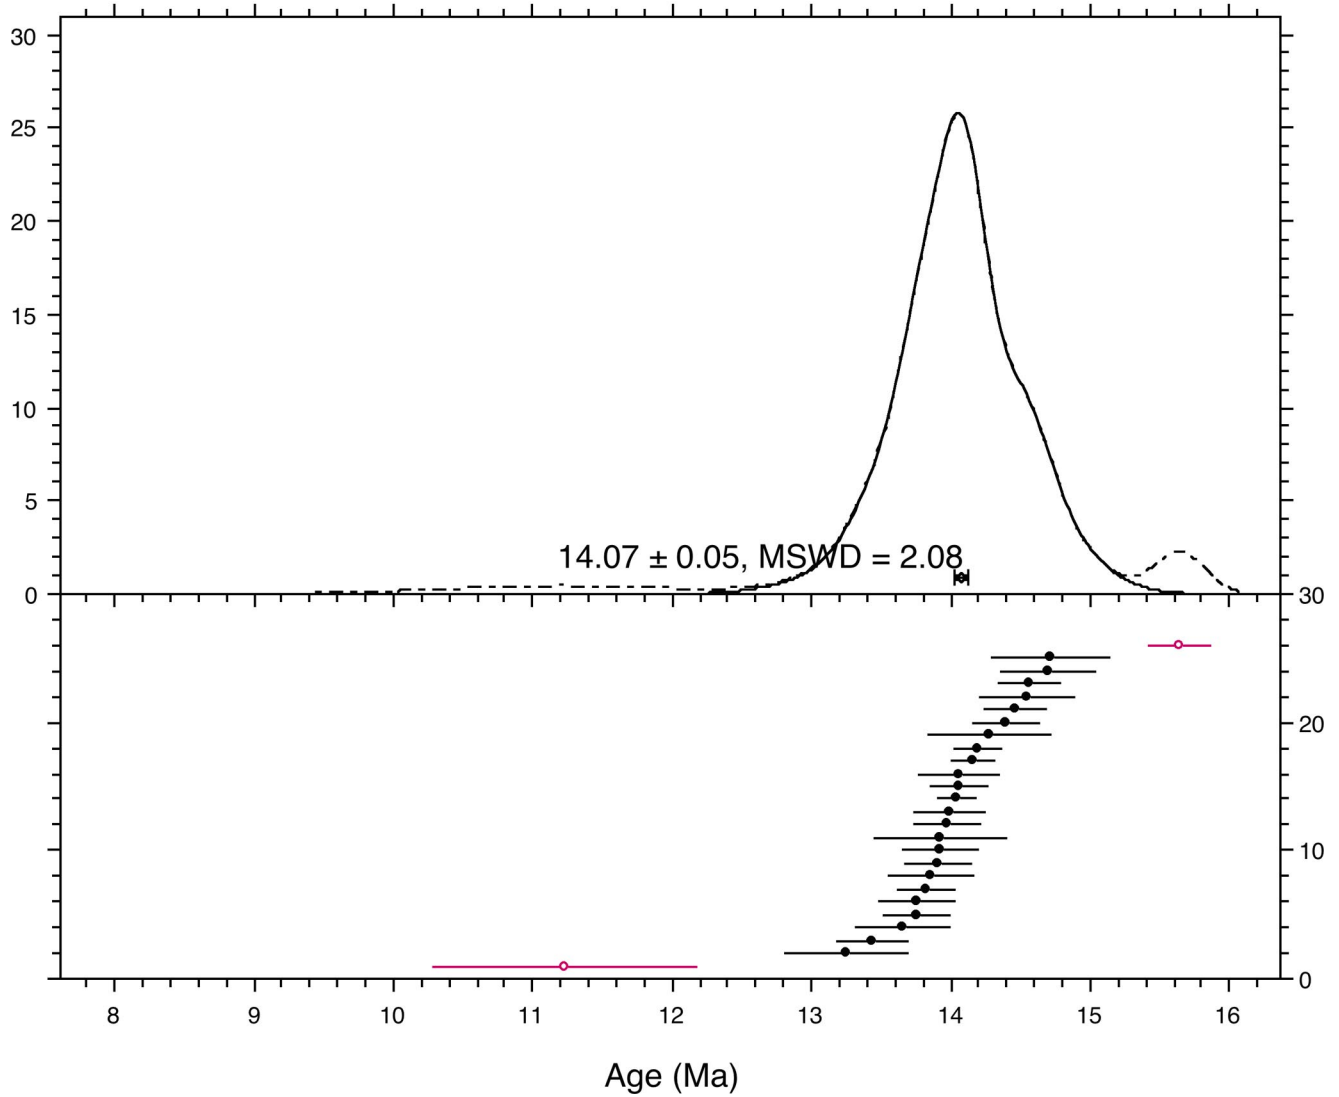

Fig. S1. Age probability spectrum of single-crystal analyses. Results  $>3\sigma$  from the mean (shown in red) are excluded from the age calculation.

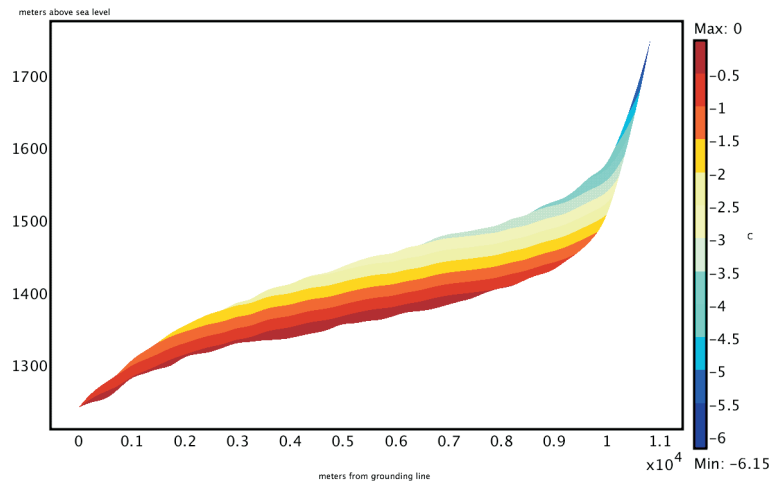

Fig. S2. Homologous temperatures for Olympus Range glacier at the transition between cold- and warm-based conditions.



**Table S2. Mount Boreas site sediment carbon analyses**

| Sample no. | Description  | $\delta^{13}\text{C}$ | % C | % N | C/N  |
|------------|--------------|-----------------------|-----|-----|------|
| 05-21A     | Fluvial 1    | -23.7                 |     |     |      |
| 05-21C     | Fluvial 3    | -26.2                 |     |     |      |
| 05-21D     | Fluvial 4    | -26.6                 |     |     |      |
| 05-21E     | Fluvial 5    | -25.7                 |     |     |      |
| 05-21F     | Fluvial 5    | -23.3                 |     |     |      |
| 05-21G     | Fluvial 5    | -21.8                 |     |     |      |
| 05-21H     | Lacustrine 1 | -23.5                 | 1.9 | 0.1 | 13.9 |
| 05-21I     | Lacustrine 2 | -25.0                 | 2.6 | 0.2 | 14.2 |
| 05-21J     | Lacustrine 2 | -24.7                 | 2.1 | 0.2 | 12.5 |
| 05-21K     | Lacustrine 2 | -24.3                 | 1.6 | 0.1 | 11.6 |
| 05-21L     | Lacustrine 4 | -23.5                 | 3.3 | 0.2 | 22.2 |
| 05-21M     | Lacustrine 5 | -23.1                 | 2.2 | 0.2 | 12.8 |
| 05-21N     | Lacustrine 5 | -19.0                 | 0.6 | 0.1 | 9.8  |
| 05-21O     | Lacustrine 6 | -23.0                 |     |     |      |
| 05-21P     | Lacustrine 6 | -19.2                 |     |     |      |
| 05-21Q     | Lacustrine 6 | -25.4                 |     |     |      |
| 05-21R     | Lacustrine 6 | -24.6                 |     |     |      |
| 05-21S     | Lacustrine 6 | -26.6                 |     |     |      |
| 05-21T     | Lacustrine 6 | -22.1                 |     |     |      |

Numbered beds in the second column refer to the numbered beds displayed in Fig. 2. Analyses were conducted at the NERC Isotope Geosciences Laboratory, Kingsley Dunham Centre, Keyworth, Nottingham NG12 5GG, United Kingdom.  $^{13}\text{C}/^{12}\text{C}$  analyses were performed by combustion in a Carlo Erba NA1500 on-line to a VG Optima dual-inlet mass spectrometer with  $\delta^{13}\text{C}$  values calculated to the VPDB scale. Percent C values were determined simultaneously by reference to an internal standard from the mean (shown in red) excluded from the age calculation.
